# Supplementary material for: A Passive Heat Maintenance Strategy Implemented during a Simulated Half-Time Improves Lower Body Power Output and Repeated Sprint Ability in Professional Rugby Union Players
Source: PLoS One. 2015 Mar 18;10(3):e0119374. doi: 10.1371/journal.pone.0119374 (PMC4365002; doi:10.1371/journal.pone.0119374)
Supplement: S2 Table — (XLSX) [file pone.0119374.s002.xlsx]

## Sheet: PPO
	Control		Passive
	Post -RSSA 1	Pre-RSSA 2	Post -RSSA 1	Pre-RSSA 2
1	6074.5	5652.2	6050.5	5813
2	5664.3	5322.3	5674.6	5400.2
3	6086.6	5785.4	6097.6	5986.5
4	5430	5175.4	5434	5245.4
5	5644.1	5222.3	5656.5	5432.1
6	6422.3	6086.4	6433.5	6201.3
7	5994	5766.3	5992	5788.7
8	5797	5475.4	5789	5504.5
9	5873.8	5333.5	5870	5605.6
10	5075.1	4553.1	5077.1	4675
11	5387.07	5044.4	5350	5108.89
12	5010.5	4682.2	5102.2	4986.6
13	5800	5223	5790	5567
14	6866.4	6176.5	6798.4	6572.5
15	5966.3	5537.4	5967	5689
16	5875.3	5235.4	5864.5	5732.4
17	6222.4	5997.4	6187.6	5897
18	5999.8	5645.3	6058	5767.4
MEAN	5843.86	5439.66	5844.03	5609.62
SD	449.903	443.486	433.024	444.235
SEM	106.043	104.531	102.065	104.707
