# Supplementary material for: A Passive Heat Maintenance Strategy Implemented during a Simulated Half-Time Improves Lower Body Power Output and Repeated Sprint Ability in Professional Rugby Union Players
Source: PLoS One. 2015 Mar 18;10(3):e0119374. doi: 10.1371/journal.pone.0119374 (PMC4365002; doi:10.1371/journal.pone.0119374)
Supplement: S3 Table — (XLSX) [file pone.0119374.s003.xlsx]

## Sheet: Sheet1
	Control												Passive
	Sprint 1	Sprint 2	Sprint 3	Sprint 4	Sprint 5	Sprint 6	Sprint 7	Sprint 8	Sprint 9	Sprint 10	Sprint 11	Sprint 12	Sprint 1	Sprint 2	Sprint 3	Sprint 4	Sprint 5	Sprint 6	Sprint 7	Sprint 8	Sprint 9	Sprint 10	Sprint 11	Sprint 12
1	6.8	6.99	7.05	7.13	7.22	7.15	6.96	7.2	7.26	7.39	7.47	7.55	6.78	6.97	7.07	7.09	7.29	7.22	6.84	7.05	7.28	7.44	7.52	7.6
2	6.95	7.06	7.13	7.27	7.39	7.41	7.09	7.29	7.41	7.54	7.66	7.71	6.9	7.03	7.1	7.33	7.33	7.47	7	7.15	7.38	7.5	7.65	7.69
3	6.76	6.99	7.07	7.17	7.23	7.33	6.93	7.1	7.3	7.45	7.58	7.73	6.73	7.02	7.1	7.2	7.3	7.38	6.88	7	7.35	7.41	7.52	7.67
4	6.78	6.91	7	7.12	7.22	7.36	6.9	7.18	7.27	7.41	7.59	7.76	6.8	7	6.95	7.06	7.19	7.26	6.84	7.14	7.22	7.46	7.62	7.73
5	6.6	6.75	6.84	6.97	6.98	6.9	6.72	6.99	7.1	7.23	7.33	7.5	6.62	6.7	6.8	6.94	7.02	7	6.68	6.87	7.14	7.2	7.29	7.45
6	6.74	6.88	6.98	7.02	6.99	7.2	6.9	7.01	7.27	7.3	7.39	7.6	6.72	6.85	7.04	7.06	7.09	7.15	6.8	6.92	7.22	7.33	7.37	7.54
7	6.68	6.76	6.86	6.97	7.16	7.23	6.73	6.95	7.1	7.2	7.41	7.67	6.71	6.79	6.83	6.92	7.19	7.22	6.63	6.89	7.13	7.12	7.45	7.7
8	6.95	7.03	7.1	7.23	7.33	7.4	7.11	7.2	7.43	7.54	7.68	7.82	6.9	7	7.12	7.26	7.3	7.37	7	7.05	7.43	7.48	7.7	7.89
9	6.33	6.41	6.52	6.7	6.88	6.98	6.44	6.61	6.77	6.97	7.24	7.37	6.36	6.45	6.5	6.66	6.83	7	6.26	6.57	6.69	6.9	7.23	7.4
10	6.74	6.8	6.9	7.11	7.19	7.34	6.82	7	7.15	7.31	7.51	7.74	6.69	6.7	6.99	7.13	7.22	7.3	6.72	6.8	7.1	7.35	7.52	7.68
11	6.7	6.81	6.94	7.13	7.26	7.22	6.82	6.95	7.23	7.43	7.61	7.6	6.72	6.84	6.88	7.16	7.27	7.28	6.66	6.78	7.23	7.39	7.66	7.7
12	6.85	6.97	7.04	7.09	7.24	7.21	7.01	7.1	7.15	7.29	7.5	7.69	6.82	6.92	7.09	7	7.23	7.29	7.03	7.04	7.15	7.24	7.45	7.6
13	6.58	6.81	6.93	7.03	7.13	7.16	6.7	7.03	7.17	7.3	7.46	7.65	6.6	6.83	6.9	7.09	7.18	7.18	6.59	6.98	7.12	7.28	7.5	7.66
14	6.78	6.87	6.9	6.91	6.92	6.89	6.9	7.02	7.12	7.21	7.23	7.29	6.8	6.9	6.96	6.8	7	6.99	6.86	7	7.14	7.27	7.21	7.3
15	6.89	7.05	7.08	7.49	7.35	7.48	7.09	7.2	7.32	7.59	7.7	7.88	6.86	7.08	7.01	7.36	7.39	7.5	6.98	7.17	7.3	7.5	7.67	7.78
16	6.82	7.01	7.17	7.15	7.24	7.17	6.98	7.15	7.29	7.45	7.59	7.75	6.81	6.94	7.14	7.19	7.21	7.3	6.84	7.05	7.25	7.48	7.62	7.73
17	6.97	7.08	7.12	7.29	7.41	7.43	7.1	7.24	7.43	7.53	7.66	7.83	6.99	7.02	7.02	7.25	7.44	7.47	7	7.13	7.48	7.39	7.59	7.8
18	6.78	7.01	7.1	7.19	7.25	7.35	7	7.21	7.31	7.46	7.55	7.75	6.76	7.1	7.15	7.18	7.21	7.32	6.87	7.08	7.33	7.42	7.58	7.69
MEAN	6.76111	6.89944	6.985	7.10944	7.18833	7.23389	6.9	7.07944	7.22667	7.36667	7.50889	7.66056	6.75389	6.89667	6.98056	7.09333	7.205	7.26111	6.80444	6.98167	7.21889	7.34222	7.50833	7.645
SD	0.153657	0.163148	0.152634	0.170034	0.154929	0.174933	0.174052	0.158243	0.155903	0.155677	0.143809	0.155279	0.138867	0.16277	0.159465	0.180163	0.146859	0.155332	0.192452	0.154625	0.172929	0.155547	0.150147	0.145733
SEM	0.0362173	0.0384544	0.0359761	0.0400773	0.0365171	0.0412322	0.0410245	0.0372982	0.0367468	0.0366934	0.0338961	0.0365995	0.0327312	0.0383653	0.0375863	0.0424649	0.0346151	0.0366122	0.0453615	0.0364454	0.0407598	0.0366627	0.03539	0.0343497
